# Supplementary material for: Influence of β-Cyclodextrin Methylation on Host-Guest Complex Stability: A Theoretical Study of Intra- and Intermolecular Interactions as Well as Host Dimer Formation
Source: MDPI journal article supplement (doi:10.3390/molecules28062625), 2023-03-14
Supplement: s1 [file s1]

# Supporting Information

## **Influence of $\beta$ -Cyclodextrin Methylation on Host-Guest Complex Stability: A Theoretical Study of Intra- and Intermolecular Interactions as well as Host Dimer Formation**

Niklas Geue<sup>1</sup>, Jackson J. Alcázar<sup>2,\*</sup> and Paola R. Campodónico<sup>2</sup>

*<sup>1</sup>Michael Barber Centre for Collaborative Mass Spectrometry, Manchester Institute of Biotechnology, Department of Chemistry, The University of Manchester, 131 Princess Street, Manchester, M1 7DN, UK. <sup>2</sup>Centro de Química Médica, Facultad de Medicina Clínica Alemana, Universidad del Desarrollo, Santiago 7780272, Chile.*

\*Corresponding Author: [jackson.alcazar@udd.cl](mailto:jackson.alcazar@udd.cl)

## Table of Contents:

**Figure S1.** Color-filled scatter plots of the reduced density gradient versus the sign of the second Hessian eigenvalue multiplied by the electron density of a)  **$\beta$ -CD** and b) **DM-  $\beta$ -CD**. The data was obtained by evaluating the B97-3c density. To cover the entire system, the grid configuration used was about 1728000 points in total. c) Description of the color scale according to  $\text{sign}(\lambda_2)\rho$ ,  $\lambda_2$  and  $\rho$ . 3

**Figure S2.** Color-filled scatter plots of the reduced density gradient versus the sign of the second Hessian eigenvalue, multiplied by the electron density of a) the  **$\beta$ -CD dimer**, b) the **DM- $\beta$ -CD dimer**, c) the  **$\beta$ -CD/phenol** complex and d) the **DM- $\beta$ -CD/phenol** complex. The data was obtained by evaluating the B97-3c density. To cover the entire system, the grid configuration used was around 1728000 points in total. .... 4

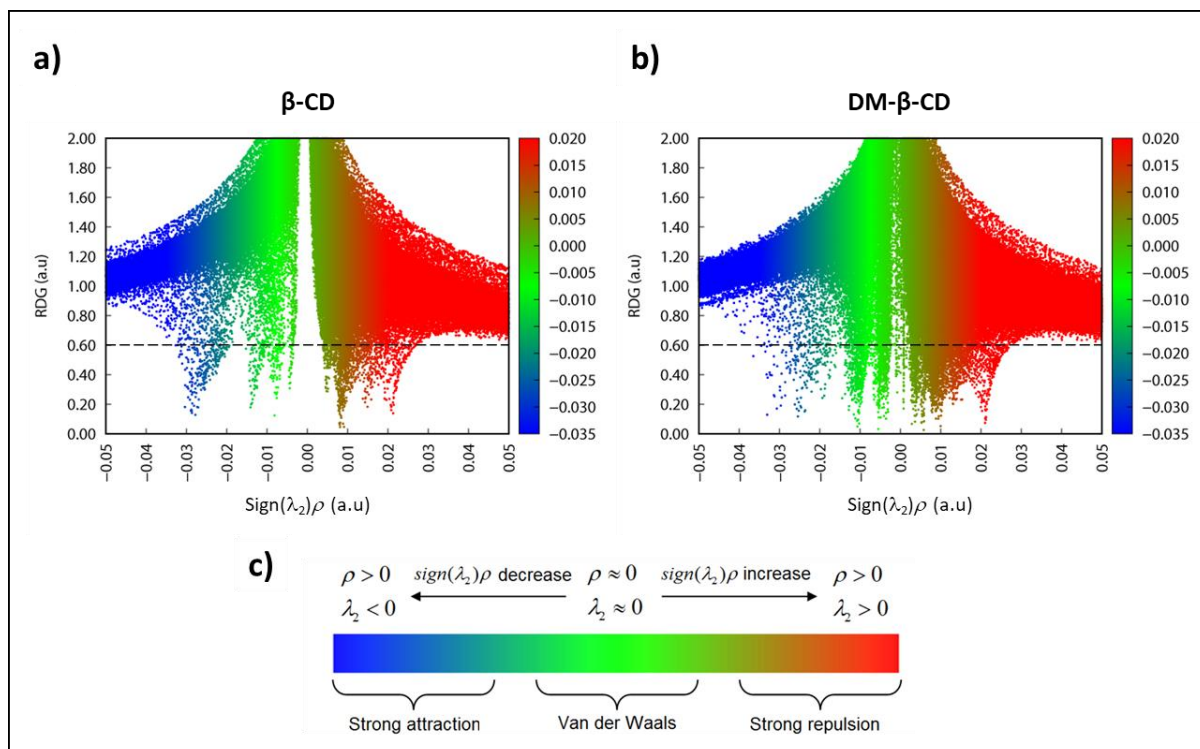

**Figure S1.** Color-filled scatter plots of the reduced density gradient versus the sign of the second Hessian eigenvalue multiplied by the electron density of a)  $\beta$ -CD and b) DM- $\beta$ -CD. The data was obtained by evaluating the B97-3c density. To cover the entire system, the grid configuration used was about 1728000 points in total. c) Description of the color scale according to  $\text{sign}(\lambda_2)\rho$ ,  $\lambda_2$  and  $\rho$ .

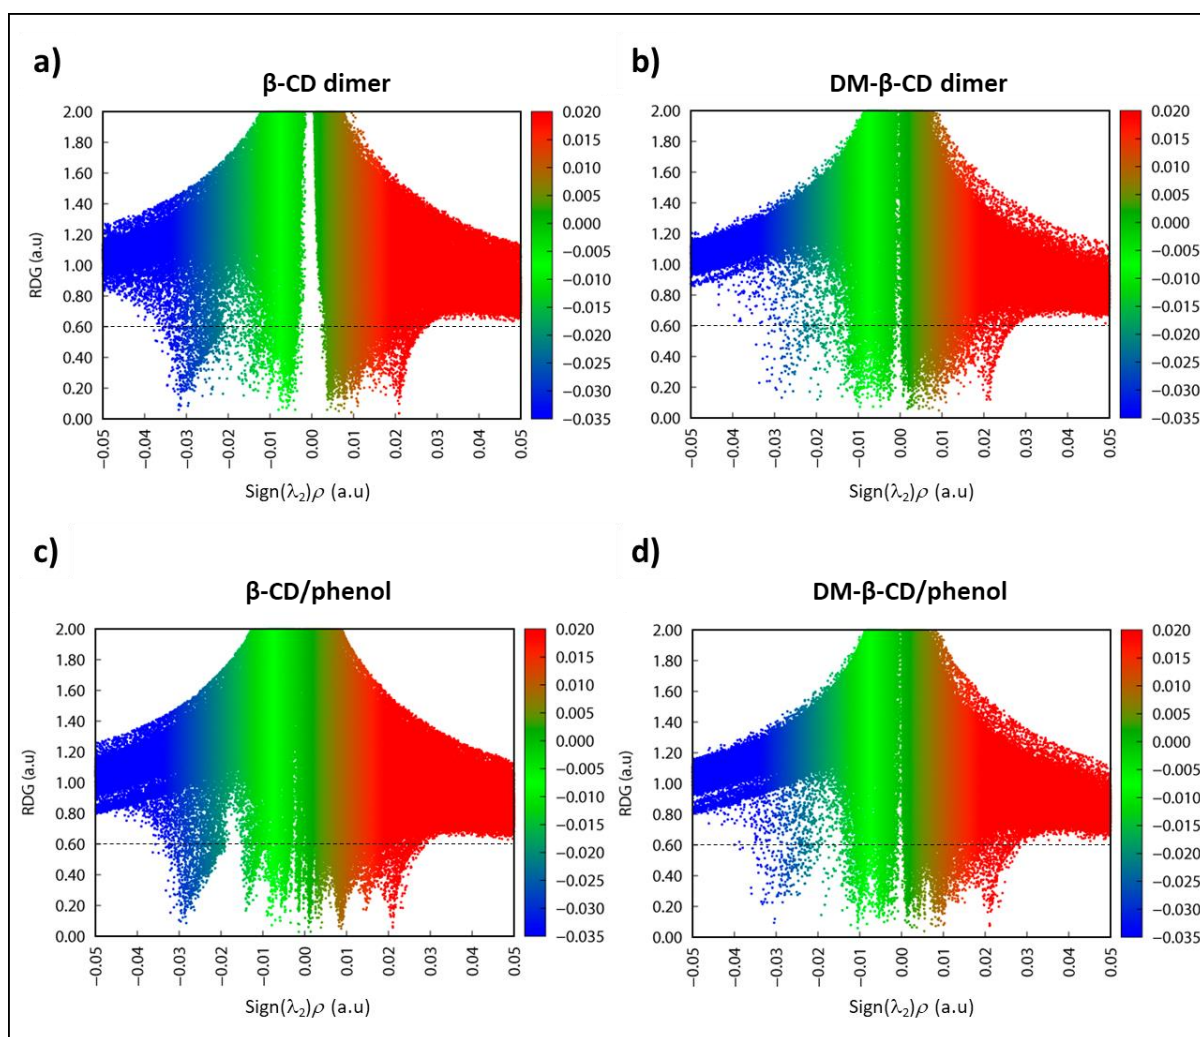

**Figure S2.** Color-filled scatter plots of the reduced density gradient versus the sign of the second Hessian eigenvalue, multiplied by the electron density of a) the  **$\beta$ -CD dimer**, b) the **DM- $\beta$ -CD dimer**, c) the  **$\beta$ -CD/phenol** complex and d) the **DM- $\beta$ -CD/phenol** complex. The data was obtained by evaluating the B97-3c density. To cover the entire system, the grid configuration used was around 1728000 points in total.
